# Supplementary material
Source: bioRxiv or medRxiv preprint supplement (https://www.medrxiv.org/highwire/filestream/82131/field_highwire_adjunct_files/0/2020.05.17.20104653-1.zip)
Supplement: Supplementary file [file 2020.05.17.20104653-1.zip]

**Forward-Step**

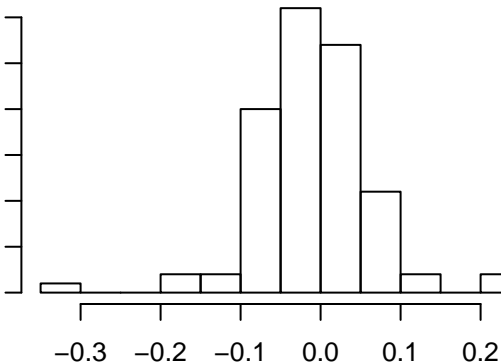

Estimated - True

**Reverse-Step**

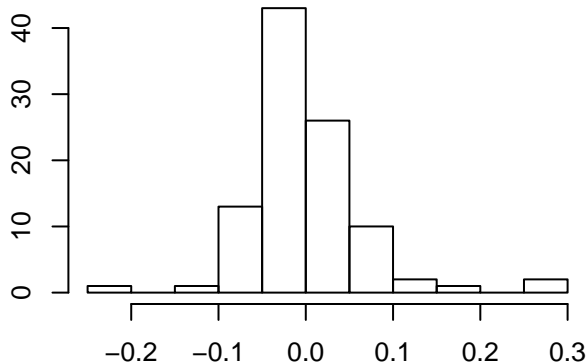

Estimated - True

**Forward-Geometric**

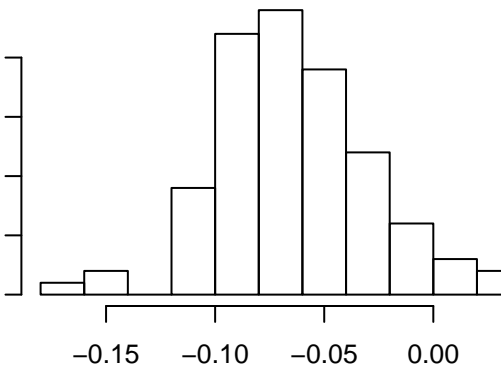

Estimated - True

**Reverse-Geometric**

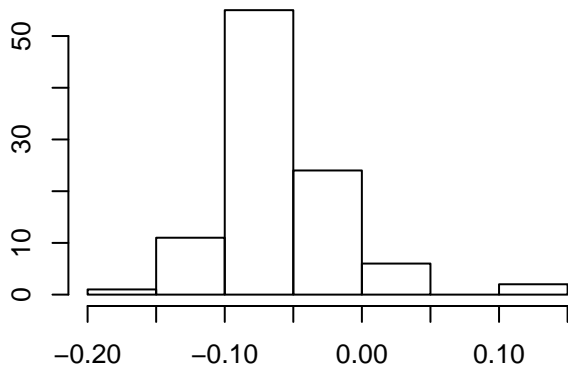

Estimated - True
