# Supplementary material
Source: bioRxiv or medRxiv preprint supplement (https://www.medrxiv.org/highwire/filestream/82131/field_highwire_adjunct_files/0/2020.05.17.20104653-1.zip)

Number

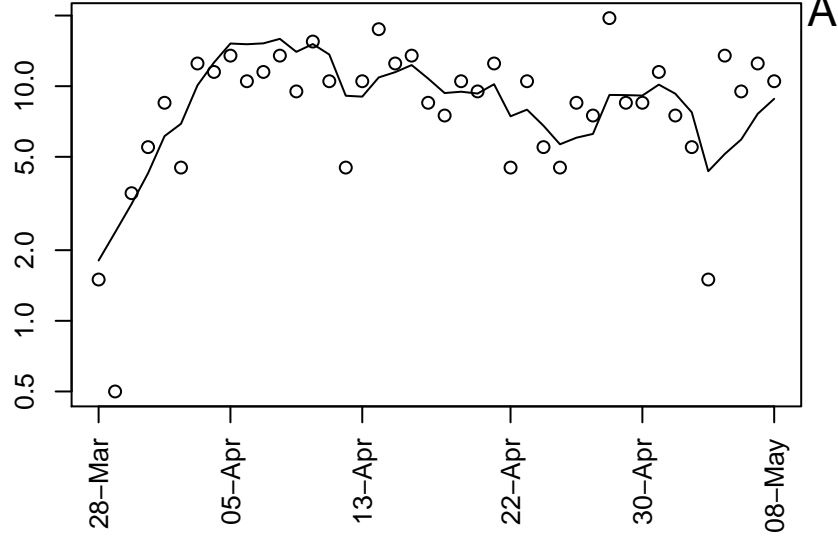

Number

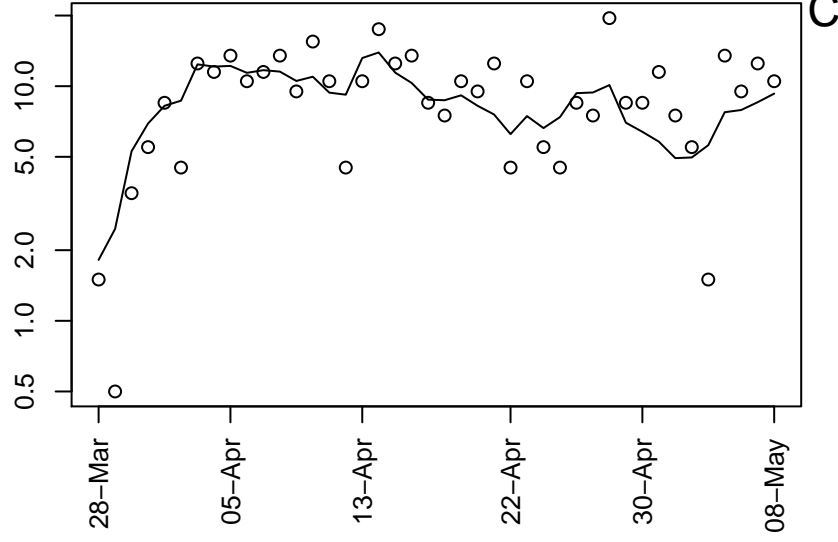 $r(t)$ 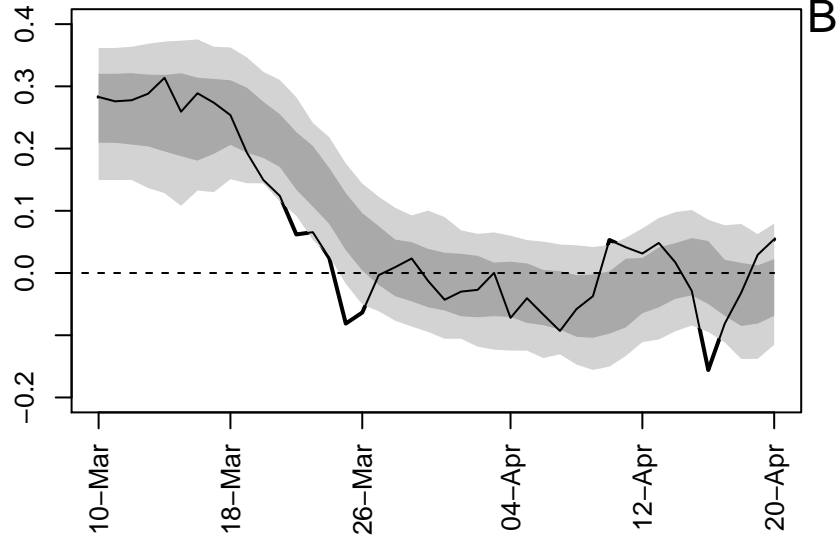 $r(t)$ 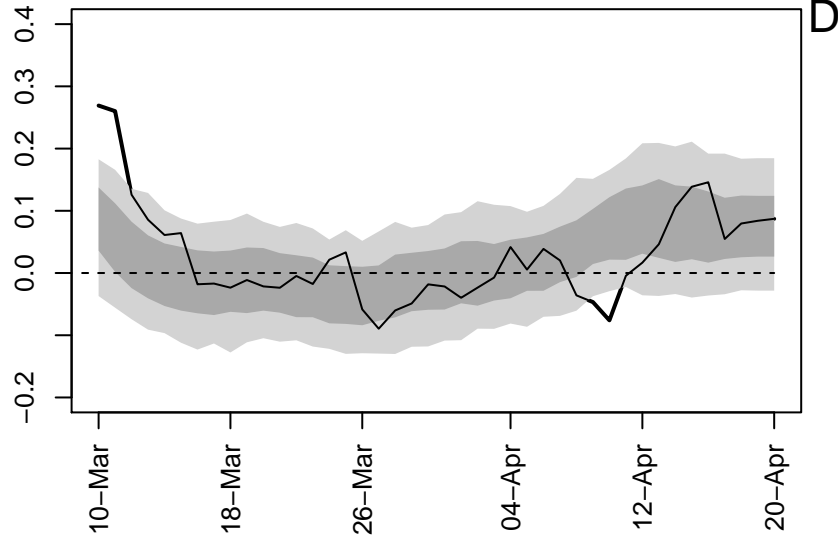

Supplement: Supplementary file [file 2020.05.17.20104653-1.zip]
